# Supplementary material
Source: PubMed Central journal article supplement (PMC7855198)
Supplement: NIHMS1630408-supplement-SDC_1.pdf [file NIHMS1630408-supplement-SDC_1.pdf]

**Table, Supplemental Digital Content 1: Descriptive Statistics of Patients by Injury Pattern**

|                                 | VLP <sup>1</sup> (n=175) | Ex-fix <sup>1</sup> (n=60) | CRPP <sup>1</sup> (n=51) | Casting (n=110) | p-value <sup>a</sup> |
|---------------------------------|--------------------------|----------------------------|--------------------------|-----------------|----------------------|
| <b>Age (years), mean (SD)</b>   | 67.4 (6.4)               | 69.7 (8.1)                 | 68.2 (6.6)               | 75.7 (9.6)      | <0.001               |
| <b>Gender, No. (%)</b>          |                          |                            |                          |                 |                      |
| <b>Male</b>                     | 10 (13.3)                | 4 (6.7)                    | 8 (15.7)                 | 17 (15.5)       | 0.39                 |
| <b>Female</b>                   | 65 (86.7)                | 56 (93.3)                  | 43 (84.3)                | 93 (84.5)       |                      |
| <b>Race, No. (%)</b>            |                          |                            |                          |                 |                      |
| <b>White</b>                    | 67 (89.3)                | 51 (85.0)                  | 46 (90.2)                | 85 (77.3)       | 0.08                 |
| <b>Non-white</b>                | 8 (10.7)                 | 9 (15.0)                   | 5 (9.8)                  | 25 (22.7)       |                      |
| <b>Comorbidities, No. (SD)</b>  | 3.1 (2.1)                | 3.6 (2.5)                  | 3.5 (2.1)                | 3.8 (2.7)       | 0.32                 |
| <b>Smoker, No. (%)</b>          |                          |                            |                          |                 |                      |
| <b>Current</b>                  | 10 (13.3)                | 4 (6.7)                    | 6 (11.8)                 | 9 (8.2)         | 0.4                  |
| <b>Former &lt; 10 years</b>     | 5 (6.7)                  | 1 (1.6)                    | 3 (5.9)                  | 2 (1.8)         |                      |
| <b>Former &gt; 10 years</b>     | 26 (34.7)                | 18 (30.0)                  | 14 (27.4)                | 42 (38.2)       |                      |
| <b>Never</b>                    | 34 (45.3)                | 37 (61.7)                  | 28 (54.9)                | 57 (51.8)       |                      |
| <b>Education, No. (%)</b>       |                          |                            |                          |                 |                      |
| <b>&lt; High school</b>         | 5 (6.7)                  | 7 (11.7)                   | 7 (13.7)                 | 19 (17.3)       | 0.52                 |
| <b>High school/GED</b>          | 19 (25.3)                | 11 (18.3)                  | 13 (25.5)                | 28 (25.5)       |                      |
| <b>Technical School</b>         | 5 (6.7)                  | 5 (8.3)                    | 3 (5.9)                  | 3 (2.7)         |                      |
| <b>Some college</b>             | 17 (22.7)                | 12 (20.0)                  | 15 (29.4)                | 27 (24.5)       |                      |
| <b>College graduate</b>         | 12 (16.0)                | 9 (15.0)                   | 7 (13.7)                 | 13 (11.8)       |                      |
| <b>Graduate degree</b>          | 13 (17.3)                | 15 (25.0)                  | 5 (9.8)                  | 19 (17.3)       |                      |
| <b>Unknown</b>                  | 4 (5.3)                  | 1 (1.7)                    | 1 (2.0)                  | 1 (0.9)         |                      |
| <b>Income, No. (%)</b>          |                          |                            |                          |                 |                      |
| <b>&lt;\$10,000</b>             | 4 (5.3)                  | 4 (6.7)                    | 1 (2.0)                  | 10 (9.1)        | 0.39                 |
| <b>\$10,000-\$19,999</b>        | 7 (9.3)                  | 10 (16.7)                  | 5 (9.8)                  | 21 (19.1)       |                      |
| <b>\$20,000-\$29,999</b>        | 9 (12.0)                 | 10 (16.7)                  | 4 (7.8)                  | 15 (13.6)       |                      |
| <b>\$30,000-\$39,999</b>        | 8 (10.7)                 | 4 (6.7)                    | 7 (13.7)                 | 17 (15.5)       |                      |
| <b>\$40,000-\$49,999</b>        | 10 (13.3)                | 6 (10.0)                   | 4 (7.8)                  | 10 (9.1)        |                      |
| <b>\$50,000-\$59,999</b>        | 4 (5.3)                  | 7 (11.7)                   | 5 (9.8)                  | 4 (3.6)         |                      |
| <b>\$60,000-\$69,999</b>        | 7 (9.3)                  | 3 (5.0)                    | 4 (7.8)                  | 8 (7.3)         |                      |
| <b>&gt;\$70,000</b>             | 18 (24.0)                | 12 (20.0)                  | 14 (27.5)                | 13 (11.8)       |                      |
| <b>unknown</b>                  | 8 (10.7)                 | 4 (6.7)                    | 7 (13.7)                 | 12 (10.9)       |                      |
| <b>Time off work, Days (SD)</b> | 11.9 (4.7)               | 28.4 (10.7)                | 11.7 (4.3)               | 6.9 (3.1)       | 0.04*                |

|                                      |            |           |           |           |      |
|--------------------------------------|------------|-----------|-----------|-----------|------|
| <b>Retired, No. (%)</b>              | 49 (65.0)  | 40 (66.7) | 28 (54.9) | 74 (67.2) | 0.46 |
| <b>Dominant hand injury, No. (%)</b> |            |           |           |           |      |
| <b>Yes</b>                           | 33 (44.0)  | 21 (35.0) | 22 (43.1) | 45 (40.9) | 0.74 |
| <b>No</b>                            | 142 (66.0) | 39 (65.0) | 29 (56.9) | 65 (59.1) |      |

<sup>a</sup> Differences in means for continuous variables was assessed using t-tests; categorical variables were assessed using chi-square tests or Fisher's exact test

<sup>1</sup> VLP: volar locking plate; Ex-fix: external fixation; CRPP: closed reduction percutaneous pinning

\* Statistical significance (defined p <0.05)
