# Supplementary material
Source: PubMed Central journal article supplement (PMC7855198)
Supplement: NIHMS1630408-supplement-SDC_2.pdf [file NIHMS1630408-supplement-SDC_2.pdf]

Table, Supplemental Digital Content 2: One Way Sensitivity Analyses

| Parameter                                       | VLPS vs. Ex-fix |           |      | VLPS vs. CRPP |         |          | VLPS vs. cast |           |           | Ex-fix vs. CRPP |           |           | Ex-fix vs. Cast |           |           | CRPP vs. Cast |           |           |          |          |           |
|-------------------------------------------------|-----------------|-----------|------|---------------|---------|----------|---------------|-----------|-----------|-----------------|-----------|-----------|-----------------|-----------|-----------|---------------|-----------|-----------|----------|----------|-----------|
|                                                 | Low             | Base      | High | Low           | Base    | High     | Low           | Base      | High      | Low             | Base      | High      | Low             | Base      | High      | Low           | Base      | High      |          |          |           |
| Age at time of injury                           | 58              | 71.1      | 97   | \$1,448       | \$2,117 | \$7,872  | Dominated     | Dominated | Dominated | Dominated       | Dominated | \$502,449 | Dominated       | Dominated | Dominated | Dominated     | Dominated | Dominated | \$18,569 | \$28,717 | \$212,528 |
| Life Expectancy (CDC)                           | 82              | 86        | 98   | \$2,583       | \$2,117 | \$1,481  | Dominated     | Dominated | Dominated | Dominated       | Dominated | Dominated | Dominated       | Dominated | Dominated | Dominated     | Dominated | Dominated | \$36,518 | \$28,717 | \$19,040  |
| <b>Complication Rates</b>                       |                 |           |      |               |         |          |               |           |           |                 |           |           |                 |           |           |               |           |           |          |          |           |
| <b>VLP</b>                                      |                 |           |      |               |         |          |               |           |           |                 |           |           |                 |           |           |               |           |           |          |          |           |
| Severe CTR                                      | 0               | 0         | 0.05 | \$2,117       | \$2,117 | \$2,788  | Dominated     | Dominated | Dominated | Dominated       | Dominated | Dominated | Dominated       | Dominated | Dominated | Dominated     | Dominated | Dominated | \$28,717 | \$28,717 | \$28,717  |
| Severe UN neuropathy                            | 0               | 0         | 0.02 | \$2,117       | \$2,117 | \$2,410  | Dominated     | Dominated | Dominated | Dominated       | Dominated | Dominated | Dominated       | Dominated | Dominated | Dominated     | Dominated | Dominated | \$28,717 | \$28,717 | \$28,717  |
| Severe Carpal instability                       | 0               | 0         | 0.02 | \$2,117       | \$2,117 | \$3,240  | Dominated     | Dominated | Dominated | Dominated       | Dominated | Dominated | Dominated       | Dominated | Dominated | Dominated     | Dominated | Dominated | \$28,717 | \$28,717 | \$28,717  |
| Tendon adhesion                                 | 0               | 0.0133333 | 0.15 | \$1,843       | \$2,117 | \$4,926  | Dominated     | Dominated | Dominated | Dominated       | Dominated | Dominated | Dominated       | Dominated | Dominated | Dominated     | Dominated | Dominated | \$28,717 | \$28,717 | \$28,717  |
| Tendon rupture                                  | 0               | 0.0133333 | 0.15 | \$1,822       | \$2,117 | \$5,136  | Dominated     | Dominated | Dominated | Dominated       | Dominated | Dominated | Dominated       | Dominated | Dominated | Dominated     | Dominated | Dominated | \$28,717 | \$28,717 | \$28,717  |
| Malunion (assume VLP revision)                  | 0               | 0.0133333 | 0.1  | \$807         | \$2,117 | \$10,627 | Dominated     | Dominated | Dominated | Dominated       | Dominated | Dominated | Dominated       | Dominated | Dominated | Dominated     | Dominated | Dominated | \$28,717 | \$28,717 | \$28,717  |
| Post-op admission                               | 0               | 0.027     | 0.03 | \$122         | \$2,117 | \$2,338  | Dominated     | Dominated | Dominated | Dominated       | Dominated | Dominated | Dominated       | Dominated | Dominated | Dominated     | Dominated | Dominated | \$28,717 | \$28,717 | \$28,717  |
| Re-admission for infection                      | 0               | 0         | 0.08 | \$2,117       | \$2,117 | \$3,562  | Dominated     | Dominated | Dominated | Dominated       | Dominated | Dominated | Dominated       | Dominated | Dominated | Dominated     | Dominated | Dominated | \$28,717 | \$28,717 | \$28,717  |
| Symptomatic malunion requiring revision surgery | 0               | 0         | 0    | \$2,117       | \$2,117 | \$2,117  | Dominated     | Dominated | Dominated | Dominated       | Dominated | Dominated | Dominated       | Dominated | Dominated | Dominated     | Dominated | Dominated | \$28,717 | \$28,717 | \$28,715  |
| <b>Exfix</b>                                    |                 |           |      |               |         |          |               |           |           |                 |           |           |                 |           |           |               |           |           |          |          |           |
| Severe CTR                                      | 0               | 0.016667  | 0.06 | \$2,341       | \$2,117 | \$1,535  | Dominated     | Dominated | Dominated | Dominated       | Dominated | Dominated | Dominated       | Dominated | Dominated | Dominated     | Dominated | Dominated | \$28,717 | \$28,717 | \$28,717  |
| Severe UN neuropathy                            | 0               | 0.016667  | 0.02 | \$2,361       | \$2,117 | \$2,068  | Dominated     | Dominated | Dominated | Dominated       | Dominated | Dominated | Dominated       | Dominated | Dominated | Dominated     | Dominated | Dominated | \$28,717 | \$28,717 | \$28,717  |
| Severe Carpal instability                       | 0               | 0.016667  | 0.02 | \$3,037       | \$2,117 | \$1,949  | Dominated     | Dominated | Dominated | Dominated       | Dominated | Dominated | Dominated       | Dominated | Dominated | Dominated     | Dominated | Dominated | \$28,717 | \$28,717 | \$28,717  |
| Tendon adhesion                                 | 0               | 0         | 0    | \$2,117       | \$2,117 | \$2,117  | Dominated     | Dominated | Dominated | Dominated       | Dominated | Dominated | Dominated       | Dominated | Dominated | Dominated     | Dominated | Dominated | \$28,717 | \$28,717 | \$28,717  |
| Tendon rupture                                  | 0               | 0.016667  | 0.02 | \$2,485       | \$2,117 | \$2,043  | Dominated     | Dominated | Dominated | Dominated       | Dominated | Dominated | Dominated       | Dominated | Dominated | Dominated     | Dominated | Dominated | \$28,717 | \$28,717 | \$28,717  |
| Malunion (assume VLP revision)                  | 0               | 0.033333  | 0.3  | \$5,259       | \$2,117 | Dominant | Dominated     | Dominated | Dominated | Dominated       | Dominated | Dominated | Dominated       | Dominated | Dominated | Dominated     | Dominated | Dominated | \$28,717 | \$28,717 | \$28,717  |
| Post-op admission                               | 0               | 0.017     | 0.02 | \$3,373       | \$2,117 | \$1,895  | Dominated     | Dominated | Dominated | Dominated       | Dominated | Dominated | Dominated       | Dominated | Dominated | Dominated     | Dominated | Dominated | \$28,717 | \$28,717 | \$28,717  |
| Re-admission for infection                      | 0               | 0         | 0.1  | \$2,117       | \$2,117 | \$310    | Dominated     | Dominated | Dominated | Dominated       | Dominated | Dominated | Dominated       | Dominated | Dominated | Dominated     | Dominated | Dominated | \$28,717 | \$28,717 | \$28,717  |
| Symptomatic malunion requiring revision surgery | 0               | 0.016667  | 0.5  | \$3,863       | \$2,117 | Dominant | Dominated     | Dominated | Dominated | Dominated       | Dominated | Dominated | Dominated       | Dominated | Dominated | Dominated     | Dominated | Dominated | \$28,717 | \$28,717 | \$28,717  |
| <b>Pinning</b>                                  |                 |           |      |               |         |          |               |           |           |                 |           |           |                 |           |           |               |           |           |          |          |           |
| Severe CTR                                      | 0               | 0.019608  | 0.02 | \$2,117       | \$2,117 | \$2,117  | Dominated     | Dominated | Dominated | Dominated       | Dominated | Dominated | Dominated       | Dominated | Dominated | Dominated     | Dominated | Dominated | \$28,445 | \$28,717 | \$28,723  |
| Severe UN neuropathy                            | 0               | 0.019608  | 0.02 | \$2,117       | \$2,117 | \$2,117  | Dominated     | Dominated | Dominated | Dominated       | Dominated | Dominated | Dominated       | Dominated | Dominated | Dominated     | Dominated | Dominated | \$28,420 | \$28,717 | \$28,723  |
| Severe Carpal instability                       | 0               | 0         | 0    | \$2,117       | \$2,117 | \$2,117  | Dominated     | Dominated | Dominated | Dominated       | Dominated | Dominated | Dominated       | Dominated | Dominated | Dominated     | Dominated | Dominated | \$28,717 | \$28,717 | \$28,717  |
| Tendon adhesion                                 | 0               | 0         | 0    | \$2,117       | \$2,117 | \$2,117  | Dominated     | Dominated | Dominated | Dominated       | Dominated | Dominated | Dominated       | Dominated | Dominated | Dominated     | Dominated | Dominated | \$28,717 | \$28,717 | \$28,717  |
| Tendon rupture                                  | 0               | 0.019608  | 0.02 | \$2,117       | \$2,117 | \$2,117  | Dominated     | Dominated | Dominated | Dominated       | Dominated | Dominated | Dominated       | Dominated | Dominated | Dominated     | Dominated | Dominated | \$28,269 | \$28,717 | \$28,726  |
| Malunion (assume VLP revision)                  | 0               | 0.019608  | 0.05 | \$2,117       | \$2,117 | \$2,117  | Dominated     | Dominated | Dominated | Dominated       | Dominated | Dominated | Dominated       | Dominated | Dominated | Dominated     | Dominated | Dominated | \$26,007 | \$28,717 | \$33,229  |
| Post-op admission                               | 0               | 0         | 0.02 | \$2,117       | \$2,117 | \$2,117  | Dominated     | Dominated | Dominated | Dominated       | Dominated | Dominated | Dominated       | Dominated | Dominated | Dominated     | Dominated | Dominated | \$28,717 | \$28,717 | \$30,244  |
| Re-admission for infection                      | 0               | 0.166667  | 0.14 | \$2,117       | \$2,117 | \$2,117  | Dominated     | Dominated | Dominated | Dominated       | Dominated | Dominated | Dominated       | Dominated | Dominated | Dominated     | Dominated | Dominated | \$25,606 | \$28,717 | \$28,219  |





|                                   |          |          |          |           |         |           |           |           |           |           |           |           |           |           |           |           |           |           |            |          |           |
|-----------------------------------|----------|----------|----------|-----------|---------|-----------|-----------|-----------|-----------|-----------|-----------|-----------|-----------|-----------|-----------|-----------|-----------|-----------|------------|----------|-----------|
| VLP                               | 0        | 11.9     | 30       | \$2,117   | \$2,117 | \$2,117   | Dominated | \$28,717   | \$28,717 | \$28,717  |
| Exfix                             | 0        | 28.4     | 75       | \$2,117   | \$2,117 | \$2,117   | Dominated | \$28,717   | \$28,717 | \$28,717  |
| Pinning                           | 0        | 11.7     | 30       | \$2,117   | \$2,117 | \$2,117   | Dominated | \$28,717   | \$28,717 | \$28,717  |
| Cast                              | 0        | 6.9      | 21       | \$2,117   | \$2,117 | \$2,117   | Dominated | \$28,717   | \$28,717 | \$28,717  |
| Retirement age                    | 60       | 66       | 70       | \$2,117   | \$2,117 | \$2,117   | Dominated | \$28,717   | \$28,717 | \$28,717  |
| Discount Rate                     | 0        | 0.03     | 0.07     | \$1,760   | \$2,117 | \$2,606   | Dominated | \$23,159   | \$28,717 | \$36,923  |
| <b>Utilities</b>                  |          |          |          |           |         |           |           |           |           |           |           |           |           |           |           |           |           |           |            |          |           |
| Baseline                          |          |          |          |           |         |           |           |           |           |           |           |           |           |           |           |           |           |           |            |          |           |
| VLP                               | 0.493266 | 0.522407 | 0.551548 | \$2,132   | \$2,117 | \$2,102   | Dominated | \$28,717   | \$28,717 | \$28,717  |
| Exfix                             | 0.486214 | 0.519847 | 0.553481 | \$2,100   | \$2,117 | \$2,134   | Dominated | \$28,717   | \$28,717 | \$28,717  |
| Pinning                           | 0.497425 | 0.529886 | 0.562347 | \$2,117   | \$2,117 | \$2,117   | Dominated | \$28,951   | \$28,717 | \$28,487  |
| Cast                              | 0.535179 | 0.556447 | 0.577714 | \$2,117   | \$2,117 | \$2,117   | Dominated | \$28,566   | \$28,717 | \$28,870  |
| 2 week                            |          |          |          |           |         |           |           |           |           |           |           |           |           |           |           |           |           |           |            |          |           |
| VLP                               | 0.525426 | 0.547341 | 0.569256 | \$2,139   | \$2,117 | \$2,095   | Dominated | \$28,717   | \$28,717 | \$28,717  |
| Exfix                             | 0.519718 | 0.540756 | 0.561795 | \$2,095   | \$2,117 | \$2,138   | Dominated | \$28,717   | \$28,717 | \$28,717  |
| Pinning                           | 0.494936 | 0.525267 | 0.555598 | \$2,117   | \$2,117 | \$2,117   | Dominated | \$29,157   | \$28,717 | \$28,290  |
| Cast                              | 0.545826 | 0.56389  | 0.581954 | \$2,117   | \$2,117 | \$2,117   | Dominated | \$28,461   | \$28,717 | \$28,977  |
| 6 weeks                           |          |          |          |           |         |           |           |           |           |           |           |           |           |           |           |           |           |           |            |          |           |
| VLP                               | 0.582134 | 0.599723 | 0.617312 | \$2,144   | \$2,117 | \$2,090   | Dominated | \$28,717   | \$28,717 | \$28,717  |
| Exfix                             | 0.538678 | 0.564812 | 0.590946 | \$2,077   | \$2,117 | \$2,157   | Dominated | \$28,717   | \$28,717 | \$28,717  |
| Pinning                           | 0.55149  | 0.578104 | 0.604718 | \$2,117   | \$2,117 | \$2,117   | Dominated | \$29,299   | \$28,717 | \$28,158  |
| Cast                              | 0.590784 | 0.606551 | 0.622318 | \$2,117   | \$2,117 | \$2,117   | Dominated | \$28,383   | \$28,717 | \$29,059  |
| 3 month                           |          |          |          |           |         |           |           |           |           |           |           |           |           |           |           |           |           |           |            |          |           |
| VLP                               | 0.664415 | 0.692727 | 0.72104  | \$2,207   | \$2,117 | \$2,034   | Dominated | \$28,717   | \$28,717 | \$28,717  |
| Exfix                             | 0.616986 | 0.647718 | 0.678451 | \$2,027   | \$2,117 | \$2,215   | Dominated | \$28,717   | \$28,717 | \$28,717  |
| Pinning                           | 0.640717 | 0.674091 | 0.707466 | \$2,117   | \$2,117 | \$2,117   | Dominated | \$30,222   | \$28,717 | \$27,355  |
| Cast                              | 0.644338 | 0.666098 | 0.687857 | \$2,117   | \$2,117 | \$2,117   | Dominated | \$27,814   | \$28,717 | \$29,681  |
| 6 month                           |          |          |          |           |         |           |           |           |           |           |           |           |           |           |           |           |           |           |            |          |           |
| VLP                               | 0.685632 | 0.718746 | 0.751859 | \$2,358   | \$2,117 | \$1,920   | Dominated | \$28,717   | \$28,717 | \$28,717  |
| Exfix                             | 0.646745 | 0.683259 | 0.719773 | \$1,902   | \$2,117 | \$2,386   | Dominated | \$28,717   | \$28,717 | \$28,717  |
| Pinning                           | 0.664803 | 0.704268 | 0.743732 | \$2,117   | \$2,117 | \$2,117   | Dominated | \$32,863   | \$28,717 | \$25,500  |
| Cast                              | 0.647088 | 0.675109 | 0.70313  | \$2,117   | \$2,117 | \$2,117   | Dominated | \$26,356   | \$28,717 | \$31,543  |
| 12 month                          |          |          |          |           |         |           |           |           |           |           |           |           |           |           |           |           |           |           |            |          |           |
| VLP                               | 0.66445  | 0.699867 | 0.735285 | Dominated | \$2,117 | \$602     | Dominated | Dominated | \$23,813  | Dominated | Dominated | \$27,294  | Dominated | Dominated | Dominated | Dominated | Dominated | Dominated | \$25,641   | \$28,717 | \$32,632  |
| Exfix                             | 0.647451 | 0.689745 | 0.732039 | \$529     | \$2,117 | Dominated | \$38,201  | Dominated | Dominated | \$32,884  | \$28,717   | \$28,717 | \$28,717  |
| Pinning                           | 0.670185 | 0.718494 | 0.766802 | \$2,117   | \$2,117 | \$2,117   | \$13,916  | Dominated | Dominated | Dominated | Dominated | \$23,473  | Dominated  | \$28,717 | \$6,249   |
| Cast                              | 0.675333 | 0.706742 | 0.738152 | \$2,117   | \$2,117 | \$2,117   | Dominated | Dominated | Dominated | \$31,291  | Dominated | Dominated | Dominated | Dominated | Dominated | \$64,370  | Dominated | Dominated | \$8,886.45 | \$28,717 | Dominated |
| Decrement utility<br>Wrist Fusion | -0.108   | -0.063   | 0        | \$2,006   | \$2,117 | \$2,294   | Dominated | \$27,844   | \$28,717 | \$30,035  |
